# Supplementary material
Source: MDPI journal article supplement (https://www.mdpi.com/1648-9144/60/2/282)
Supplement: s1 [file s1]

Archive with 3 entries (3 files):
- Table S1 Reporting Guideline Checklist.pdf
- Table S2 CASP Checklist.pdf
- Table S3 Literature quotations.pdf
