# Supplementary material for: Sphenoid Sinus Mucosal Flap after Transsphenoidal Surgery—A Systematic Review
Source: MDPI journal article supplement (doi:10.3390/medicina60020282), 2024-02-06
Supplement: s1 [file s1]

### Example literature quotations used to construct descriptive themes

| Descriptive themes                | Quotations                                                                                                                                                                                                                                                                                                                                                                                                                                                                                                                                                                                                                                                                                                                                                                                                                                                                                                             |
|-----------------------------------|------------------------------------------------------------------------------------------------------------------------------------------------------------------------------------------------------------------------------------------------------------------------------------------------------------------------------------------------------------------------------------------------------------------------------------------------------------------------------------------------------------------------------------------------------------------------------------------------------------------------------------------------------------------------------------------------------------------------------------------------------------------------------------------------------------------------------------------------------------------------------------------------------------------------|
| <i><b>Surgical techniques</b></i> | <p>“...we describe the technique of using a free flap of sphenoid sinus mucosa or a vascular pedicle sphenoid mucosal flap to repair intraoperative CSF leakage ...”</p> <p>“The mucosa dipped with fibrin glue component A (fibrinogen solution) was placed as a patch on the laceration and, immediately after gelatin sponge with fibrin glue B component....”</p> <p>“ In cases of relatively large arachnoid lacerations or space between dura and remaining normal pituitary gland, SSM was sutured to the laceration edges by 6-0 nylon ”</p> <p>Amano et al. <sup>21</sup></p> <p>“Therefore, we designed three types of mucosal closure including an intersinus septal mucosal flap, a superiorly based mucosal flap and an inferiorly based mucosal flap.”</p> <p>Yoon et al. <sup>28</sup></p>                                                                                                              |
| <i><b>Advantages</b></i>          | <p>“Patients receiving a NSF tended to experience worse sinonasal QoL compared to the SMF group for the first 3 months postoperatively, reaching significance (<math>p &lt; 0.05</math>) at day 1 and weeks 3 and 6 postoperatively. ”</p> <p>Castle-Kirsbaum et al. <sup>22</sup></p> <p>“Figure 4 shows pre- and postoperative PNS CT images of both groups. The volumes of the posterior wall of the sphenoid sinus before and after surgery were measured using Mimics, and the differences were calculated (Table II). The postoperative volume was significantly smaller in the test group than in the control group (<math>P = .012</math>), and the difference (postoperative minus preoperative) was also smaller in the test group than in the control group (<math>P = .046</math>); the preoperative volumes did not significantly differ (<math>P = .102</math>). ”</p> <p>Jeong et al. <sup>26</sup></p> |
| <i><b>Limitations</b></i>         | <p>“In some cases, the mucosa is a thick layer and can match dura in its thickness and elasticity.”</p> <p>Goel et al. <sup>23</sup></p> <p>“Analysis of the pre- and postoperative VAS scores revealed that patients in the ISM group did not experience a significant improvement in headaches compared with the comparison group. This suggested the clinical significance of ISM.”</p> <p>Kim et al. <sup>27</sup></p>                                                                                                                                                                                                                                                                                                                                                                                                                                                                                             |
