# Supplementary material for: Sphenoid Sinus Mucosal Flap after Transsphenoidal Surgery—A Systematic Review
Source: MDPI journal article supplement (doi:10.3390/medicina60020282), 2024-02-06
Supplement: s1 [file s1]

CASP(Critical Appraisal Skills Programme) Checklist (Yes, No, Can't Tell)

| Study authors<br>(year)                      | Section A: Are the results valid?                                    |                                                         |                                                                                               |                                                                                            |                                                                                         |                                                                                                               | Section B: What are the results?                                  |                                                          |                                                  | Section C: Will<br>the results help<br>locally? |
|----------------------------------------------|----------------------------------------------------------------------|---------------------------------------------------------|-----------------------------------------------------------------------------------------------|--------------------------------------------------------------------------------------------|-----------------------------------------------------------------------------------------|---------------------------------------------------------------------------------------------------------------|-------------------------------------------------------------------|----------------------------------------------------------|--------------------------------------------------|-------------------------------------------------|
|                                              | 1. Was there a<br>clear statement<br>of the aims of<br>the research? | 2. Is the<br>qualitative<br>methodology<br>appropriate? | 3. Was the<br>research<br>design<br>appropriate to<br>address the<br>aims of the<br>research? | 4. Was the<br>recruitment<br>strategy<br>appropriate<br>to the aims<br>of the<br>research? | 5. Was the<br>data<br>collected in<br>a way that<br>addressed<br>the research<br>issue? | 6. Has the<br>relationship<br>between the<br>researcher and<br>participants been<br>adequately<br>considered? | 7. Have<br>ethical issues<br>been taken<br>into<br>consideration? | 8. Was the data<br>analysis<br>sufficiently<br>rigorous? | 9. Is there a<br>clear statement<br>of findings? | 10. How valuable<br>is the research?            |
| Amano et al. <sup>21</sup>                   | Yes                                                                  | Yes                                                     | Yes                                                                                           | Yes                                                                                        | Yes                                                                                     | Yes                                                                                                           | Can't tell                                                        | Yes                                                      | Yes                                              | Yes                                             |
| Castle-<br>Kirszbaum et<br>al. <sup>22</sup> | Yes                                                                  | Yes                                                     | Yes                                                                                           | Yes                                                                                        | Yes                                                                                     | Yes                                                                                                           | Yes                                                               | Yes                                                      | Yes                                              | Yes                                             |
| Goel et al. <sup>23</sup>                    | Yes                                                                  | Yes                                                     | Yes                                                                                           | Yes                                                                                        | Yes                                                                                     | Yes                                                                                                           | Can't tell                                                        | No                                                       | Yes                                              | Yes                                             |
| Goljo et al. <sup>24</sup>                   | Yes                                                                  | Yes                                                     | Yes                                                                                           | Yes                                                                                        | Yes                                                                                     | Can't tell                                                                                                    | Can't tell                                                        | No                                                       | Yes                                              | Yes                                             |

|                            |     |     |     |     |     |            |            |            |     |     |
|----------------------------|-----|-----|-----|-----|-----|------------|------------|------------|-----|-----|
| Hara et al. <sup>25</sup>  | Yes | Yes | Yes | Yes | Yes | Yes        | Can't tell | Yes        | Yes | Yes |
| Jeong et al. <sup>26</sup> | Yes | Yes | Yes | Yes | Yes | Yes        | Yes        | Yes        | Yes | Yes |
| Kim et al. <sup>27</sup>   | Yes | Yes | yes | Yes | Yes | Yes        | Yes        | Yes        | Yes | Yes |
| Lee et al. <sup>17</sup>   | Yes | Yes | Yes | Yes | Yes | Yes        | Yes        | Yes        | Yes | Yes |
| Park et al. <sup>18</sup>  | Yes | Yes | Yes | Yes | Yes | Can't tell | Yes        | Can't tell | Yes | Yes |
| Yoon et al. <sup>28</sup>  | Yes | Yes | Yes | Yes | Yes | Yes        | Can't tell | Yes        | Yes | Yes |
